# Supplementary material for: Responses of Ecosystem Services to Climate Change: A Case Study of the Loess Plateau
Source: MDPI journal article supplement (doi:10.3390/f13122011), 2022-11-28
Supplement: s1 [file s1]

## Supplemental Information

**Table**

**Table S1.** Proportion of trade-offs and synergies between ecosystem services

|                                     | Percentage of each class(%) |        |       |
|-------------------------------------|-----------------------------|--------|-------|
|                                     | NPP&SC                      | NPP&WY | SC&WY |
| Nodata                              | 6.83                        | 0.05   | 6.19  |
| Significant positive correlation    | 74.94                       | 91.26  | 1.80  |
| Nonsignificant positive correlation | 16.35                       | 7.49   | 24.03 |
| Significant negative correlation    | 0.04                        | 0.01   | 15.92 |
| Nonsignificant negative correlation | 1.83                        | 1.18   | 52.06 |

**Table S2.** Trade-offs and synergies for changes in ecosystem services

|     | NPP    | SC     | WY |
|-----|--------|--------|----|
| NPP | —      | —      | —  |
| SC  | 0.561  | —      | —  |
| WY  | -0.044 | -0.038 | —  |

**Table S3.** Mean correlation (R) of ecosystem services and climate factors on the Loess Plateau

|     | NPP    | SC     | WY     | CES    |
|-----|--------|--------|--------|--------|
| ATP | 0.479  | 0.729  | 0.588  | 0.814  |
| MAT | 0.128  | -0.008 | -0.270 | -0.123 |
| ASR | -0.173 | -0.187 | -0.023 | -0.129 |

**Table S4.** Proportion of ecosystem services correlated with climate factors

|                                     | Percentage of each class(%) |        |        |         |
|-------------------------------------|-----------------------------|--------|--------|---------|
|                                     | NPP&ATP                     | SC&ATP | WY&ATP | TES&ATP |
| Nodata                              | 3.65                        | 0.05   | 6.19   | 6.19    |
| Significant positive correlation    | 65.30                       | 82.88  | 71.30  | 1.80    |
| Nonsignificant positive correlation | 30.07                       | 16.57  | 21.31  | 24.03   |
| Significant negative correlation    | 0.01                        | 0.03   | 0.00   | 15.92   |
| Nonsignificant negative correlation | 0.98                        | 0.47   | 1.20   | 52.06   |

  

|                                     | Percentage of each class(%) |        |        |         |
|-------------------------------------|-----------------------------|--------|--------|---------|
|                                     | NPP&MAT                     | SC&MAT | WY&MAT | TES&MAT |
| Nodata                              | 3.65                        | 0.05   | 6.19   | 1.12    |
| Significant positive correlation    | 3.55                        | 1.03   | 0.00   | 0.25    |
| Nonsignificant positive correlation | 70.64                       | 47.37  | 2.34   | 18.94   |
| Significant negative correlation    | 0.13                        | 0.73   | 11.44  | 2.41    |
| Nonsignificant negative correlation | 22.03                       | 50.83  | 80.03  | 77.28   |

  

|  | Percentage of each class(%) |        |        |         |
|--|-----------------------------|--------|--------|---------|
|  | NPP&ASR                     | SC&ASR | WY&ASR | TES&ASR |

|                                     |       |       |       |       |
|-------------------------------------|-------|-------|-------|-------|
| Nodata                              | 3.65  | 0.05  | 6.19  | 1.12  |
| Significant positive correlation    | 1.55  | 1.93  | 1.60  | 0.43  |
| Nonsignificant positive correlation | 30.20 | 27.18 | 40.14 | 28.89 |
| Significant negative correlation    | 23.74 | 25.23 | 1.89  | 11.10 |
| Nonsignificant negative correlation | 40.87 | 45.60 | 50.17 | 58.46 |

**Table S5.** Three-fold fitted equations for ecosystem services and climate factors

| Type    | Three-fold fitted equation                           | R <sup>2</sup> |
|---------|------------------------------------------------------|----------------|
| NPP&ATP | $y = -1.53e-09x^3 + 2.25e-06x^2 - 1.96e-05x + 0.089$ | 0.954          |
| NPP&MAT | $y = 2.36e-04x^3 - 0.0064x^2 + 0.056x + 0.35$        | 0.751          |
| NPP&ASR | $y = 2.89e-11x^3 - 5.46e-07x^2 + 0.0033x - 5.66$     | 0.591          |
| SC&ATP  | $y = -1.42e-10x^3 + 9.51e-07x^2 - 1.69e-05x - 0.027$ | 0.947          |
| SC&MAT  | $y = 3.39e-04x^3 - 0.0081x^2 + 0.028x + 0.39$        | 0.605          |
| SC&ASR  | $y = -1.56e-11x^3 + 2.56e-07x^2 - 0.0013x + 2.29$    | 0.251          |
| WY&ATP  | $y = -1.59e-09x^3 + 2.89e-06x^2 - 0.00033x + 0.0057$ | 0.988          |
| WY&MAT  | $y = -1.91e-04x^3 + 0.0075x^2 - 0.046x + 0.31$       | 0.871          |
| WY&ASR  | $y = 6.81e-11x^3 - 1.20e-06x^2 + 0.0068x - 11.76$    | 0.822          |
| CES&ATP | $y = -3.25e-09x^3 + 6.09e-06x^2 - 0.00037x + 0.068$  | 0.988          |
| CES&MAT | $y = 3.83e-04x^3 - 0.0070x^2 + 0.037x + 1.06$        | 0.387          |
| CES&ASR | $y = 8.14e-11x^3 - 1.49e-06x^2 + 0.0087x - 15.12$    | 0.447          |
